# Supplementary material
Source: publisher figshare collection journal article supplement (https://sage.figshare.com/ndownloader/files/13638335)
Supplement: Supplementary file 1 [file 13638335]

## SUPPLEMENTAL MATERIALS

## COMPREHENSIVE LIST OF ARTICLES INCLUDED IN REVIEW

- Adam, H., & Shirako, A. 2013. Not all anger is created equal: The impact of the expresser's culture on the social effects of anger in negotiations. *Journal of Applied Psychology*, 98: 785-798.
- Adam, H., Obodaru, O., & Galinsky, A. D. 2015. Who you are is where you are: Antecedents and consequences of locating the self in the brain or the heart. *Organizational Behavior and Human Decision Processes*, 128: 74-83.
- Allen, D. G., Peltokorpi, V., & Rubenstein, A. L. 2016. When "embedded" means "stuck": Moderating effects of job embeddedness in adverse work environments. *The Journal of Applied Psychology*, 101: 1670-1686.
- Ali, A. A., Lyons, B. J., & Ryan, A. M. 2017. Managing a perilous stigma: Ex-offenders' use of reparative impression management tactics in hiring contexts. *Journal of Applied Psychology*, 102: 1271-1285.
- Andersson, O., Huysentruyt, M., Miettinen, T., & Stephan, U. 2016. Person–Organization Fit and Incentives: A Causal Test. *Management Science*, 63: 73-96.
- Anicich, E. M., Fast, N. J., Halevy, N., & Galinsky, A. D. 2015. When the bases of social hierarchy collide: Power without status drives interpersonal conflict. *Organization Science*, 27: 123-140.
- Antonakis, J., & House, R. J. 2014. Instrumental leadership: Measurement and extension of transformational–transactional leadership theory. *The Leadership Quarterly*, 25: 746-771.

- Arnold, K. A., Connelly, C. E., Gellatly, I. R., Walsh, M. M., & Withey, M. J. 2017. Using a pattern-oriented approach to study leaders: Implications for burnout and perceived role demand. *Journal of Organizational Behavior*, 38: 1038-1056.
- Avery, D. R., McKay, P. F., & Volpone, S. D. 2016. Blaming the building: How venue quality influences consumer bias against stigmatized leaders. *Journal of Applied Psychology*, 101: 1111-1121.
- Avery, D. R., McKay, P. F., Volpone, S. D., & Malka, A. 2015. Are companies beholden to bias? The impact of leader race on consumer purchasing behavior. *Organizational Behavior and Human Decision Processes*, 127: 85-102.
- Awanis, S., Schlegelmilch, B. B., & Cui, C. C. 2017. Asia's materialists: Reconciling collectivism and materialism. *Journal of International Business Studies*, 48: 964-991.
- Ballinger, G. A., Lehman, D. W., & Schoorman, F. D. 2010. Leader-member exchange and turnover before and after succession events. *Organizational Behavior and Human Decision Processes*, 113: 25-36.
- Banks, G. C., Pollack, J. M., Bochantin, J. E., Kirkman, B. L., Whelpley, C. E., & O'Boyle, E. H. 2016. Management's science-practice gap: A grand challenge for all stakeholders. *Academy of Management Journal*, 59: 2205-2231.
- Barasch, A., Levine, E. E., & Schweitzer, M. E. 2016. Bliss is ignorance: How the magnitude of expressed happiness influences perceived naiveté and interpersonal exploitation. *Organizational Behavior and Human Decision Processes*, 137: 184-206.
- Barber, L. K., & Budnick, C. J. 2015. Turning molehills into mountains: Sleepiness increases workplace interpretive bias. *Journal of Organizational Behavior*, 36: 360-381.

- Barclay, L. J., & Kiefer, T. 2014. Approach or avoid? Exploring overall justice and the differential effects of positive and negative emotions. *Journal of Management*, 40: 1857-1898.
- Barnes, C. M., Miller, J. A., & Bostock, S. 2017. Helping employees sleep well: Effects of cognitive behavioral therapy for insomnia on work outcomes. *Journal of Applied Psychology*, 102: 104-113.
- Barnes, C. M., Schaubroeck, J., Huth, M., & Ghumman, S. 2011. Lack of sleep and unethical conduct. *Organizational Behavior and Human Decision Processes*, 115: 169-180.
- Basu, S., & Savani, K. 2017. Choosing one at a time? Presenting options simultaneously helps people make more optimal decisions than presenting options sequentially. *Organizational Behavior and Human Decision Processes*, 139: 76-91.
- Baucells, M., & Bellezza, S. 2016. Temporal profiles of instant utility during anticipation, event, and recall. *Management Science*, 63: 729-748.
- Bauman, C. W., Tost, L. P., & Ong, M. 2016. Blame the shepherd not the sheep: Imitating higher-ranking transgressors mitigates punishment for unethical behavior. *Organizational Behavior and Human Decision Processes*, 137: 123-141.
- Belmi, P., & Neale, M. 2014. Mirror, mirror on the wall, who's the fairest of them all? Thinking that one is attractive increases the tendency to support inequality. *Organizational Behavior and Human Decision Processes*, 124: 133-149.
- Bendersky, C., & Shah, N. P. 2013. The downfall of extraverts and rise of neurotics: The dynamic process of status allocation in task groups. *Academy of Management Journal*, 56: 387-406.

- Bennett, A. A., Gabriel, A. S., Calderwood, C., Dahling, J. J., & Trougakos, J. P. 2016. Better together? Examining profiles of employee recovery experiences. *Journal of Applied Psychology*, 101: 1635-1654.
- Berg, J. M. 2016. Balancing on the creative highwire: Forecasting the success of novel ideas in organizations. *Administrative Science Quarterly*, 61: 433-468.
- Bhargave, R., Chakravarti, A., & Guha, A. 2015. Two-stage decisions increase preference for hedonic options. *Organizational Behavior and Human Decision Processes*, 130: 123-135.
- Bianchi, E. C. 2013. The bright side of bad times: The affective advantages of entering the workforce in a recession. *Administrative Science Quarterly*, 58: 587-623.
- Bianchi, E. C., & Brockner, J. 2012. In the eyes of the beholder? The role of dispositional trust in judgments of procedural and interactional fairness. *Organizational Behavior and Human Decision Processes*, 118: 46-59.
- Blader, S. L., Wiesenfeld, B. M., Fortin, M., & Wheeler-Smith, S. L. 2013. Fairness lies in the heart of the beholder: How the social emotions of third parties influence reactions to injustice. *Organizational Behavior and Human Decision Processes*, 121: 62-80.
- Bøggild, T., & Laustsen, L. 2016. An intra-group perspective on leader preferences: Different risks of exploitation shape preferences for leader facial dominance. *The Leadership Quarterly*, 27: 820-837.
- Bohns, V. K., Newark, D. A., & Xu, A. Z. 2016. For a dollar, would you...? How we think money affects compliance with our requests. *Organizational Behavior and Human Decision Processes*, 134: 45-62.

Bono, J. E., Braddy, P. W., Liu, Y., Gilbert, E. K., Fleenor, J. W., Quast, L. N., & Center, B. A.

2016. Dropped on the way to the top: Gender and managerial derailment. *Personnel Psychology*, 70: 729-768.

Bourdage, J. S., Wiltshire, J., & Lee, K. 2015. Personality and workplace impression management: Correlates and implications. *Journal of Applied Psychology*, 100: 537-546.

Bowles, H. R., Babcock, L., & Lai, L. 2007. Social incentives for gender differences in the propensity to initiate negotiations: Sometimes it does hurt to ask. *Organizational Behavior and human decision Processes*, 103: 84-103.

Brady, D. L., Brown, D. J., & Liang, L. H. 2017. Moving beyond assumptions of deviance: The reconceptualization and measurement of workplace gossip. *Journal of Applied Psychology*, 102: 1-25.

Brands, R. A., Menges, J. I., & Kilduff, M. 2015. The leader-in-social-network schema: Perceptions of network structure affect gendered attributions of charisma. *Organization Science*, 26: 1210-1225.

Brands, R. A., & Fernandez-Mateo, I. 2017. Leaning out: How negative recruitment experiences shape women's decisions to compete for executive roles. *Administrative Science Quarterly*, 62: 405-442.

Brebels, L., De Cremer, D., & Van Dijke, M. 2014. Using self-definition to predict the influence of procedural justice on organizational-, interpersonal-, and job/task-oriented citizenship behavior. *Journal of Management*, 40: 731-763.

Brescoll, V. L. 2011. Who takes the floor and why: Gender, power, and volubility in organizations. *Administrative Science Quarterly*, 56: 622-641.

- Brinke, L., & Adams, G. S. 2015. Saving face? When emotion displays during public apologies mitigate damage to organizational performance. *Organizational Behavior and Human Decision Processes*, 130: 1-12.
- Brooks, A. W., Gino, F., & Schweitzer, M. E. 2015. Smart people ask for my advice: Seeking advice boosts perceptions of competence. *Management Science*, 61: 1421-1435.
- Brooks, A. W., Schroeder, J., Risen, J. L., Gino, F., Galinsky, A. D., Norton, M. I., & Schweitzer, M. E. 2016. Don't stop believing: Rituals improve performance by decreasing anxiety. *Organizational Behavior and Human Decision Processes*, 137: 71-85.
- Brown, G., & Robinson, S. L. 2011. Reactions to territorial infringement. *Organization Science*, 22: 210-224.
- Buell, R. W., Kim, T., & Tsay, C. J. 2016. Creating reciprocal value through operational transparency. *Management Science*, 63: 1673-1695.
- Burbano, V. C. 2016. Social responsibility messages and worker wage requirements: Field experimental evidence from online labor marketplaces. *Organization Science*, 27: 1010-1028.
- Burris, E. R., Rockmann, K. W., & Kimmons, Y. S. 2017. The Value of Voice to Managers: Employee Identification and the Content of Voice. *Academy of Management Journal*, 60: 2099-2125.
- Burton, J. P., Taylor, S. G., & Barber, L. K. 2014. Understanding internal, external, and relational attributions for abusive supervision. *Journal of Organizational Behavior*, 35: 871-891.

- Buser, T., & Dreber, A. 2015. The flipside of comparative payment schemes. *Management Science*, 62: 2626-2638.
- Byrne, A., Dionisi, A. M., Barling, J., Akers, A., Robertson, J., Lys, R., & Dupré, K. 2014. The depleted leader: The influence of leaders' diminished psychological resources on leadership behaviors. *The Leadership Quarterly*, 25: 344-357.
- Byrne, Z. S., Peters, J. M., & Weston, J. W. 2016. The struggle with employee engagement: Measures and construct clarification using five samples. *The Journal of Applied Psychology*, 101: 1201-1227.
- Caleo, S. 2016. Are organizational justice rules gendered? Reactions to men's and women's justice violations. *Journal of Applied Psychology*, 101: 1422-1436.
- Cameron, A. F., & Webster, J. 2011. Relational outcomes of multicommuting: Integrating incivility and social exchange perspectives. *Organization Science*, 22: 754-771.
- Carlson, D., Ferguson, M., Hunter, E., & Whitten, D. 2012. Abusive supervision and work-family conflict: The path through emotional labor and burnout. *The Leadership Quarterly*, 23: 849-859.
- Carlson, D. S., Ferguson, M., Perrewé, P. L., & Whitten, D. 2011. The fallout from abusive supervision: An examination of subordinates and their partners. *Personnel Psychology*, 64: 937-961.
- Carlson, D. S., Hunter, E. M., Ferguson, M., & Whitten, D. 2014. Work-family enrichment and satisfaction: Mediating processes and relative impact of originating and receiving domains. *Journal of Management*, 40: 845-865.

- Carmeli, A., Brammer, S., Gomes, E., & Tarba, S. Y. 2017. An organizational ethic of care and employee involvement in sustainability-related behaviors: A social identity perspective. *Journal of Organizational Behavior*, 38: 1380-1395.
- Carpenter, N. C., Rangel, B., Jeon, G., & Cottrell, J. 2017. Are supervisors and coworkers likely to witness employee counterproductive work behavior? An investigation of observability and self-observer convergence. *Personnel Psychology*, 70: 843-889.
- Carton, A. M., Murphy, C., & Clark, J. R. 2014. A blurry vision of the future: How leader rhetoric about ultimate goals influences performance. *Academy of Management Journal*, 57: 1544-1570.
- Casciaro, T., Gino, F., & Kouchaki, M. 2014. The contaminating effects of building instrumental ties how networking can make us feel dirty. *Administrative Science Quarterly*, 59: 705-735.
- Cavanaugh, L. A., Gino, F., & Fitzsimons, G. J. 2015. When doing good is bad in gift giving: Mis-predicting appreciation of socially responsible gifts. *Organizational Behavior and Human Decision Processes*, 131: 178-189.
- Caza, A., Zhang, G., Wang, L., & Bai, Y. 2015. How do you really feel? Effect of leaders' perceived emotional sincerity on followers' trust. *The Leadership Quarterly*, 26: 518-531.
- Chang, J. W., Chow, R. M., & Woolley, A. W. 2017. Effects of inter-group status on the pursuit of intra-group status. *Organizational Behavior and Human Decision Processes*, 139: 1-17.
- Chen, M., Chen, C. C., & Sheldon, O. J. 2016. Relaxing moral reasoning to win: How organizational identification relates to unethical pro-organizational behavior. *Journal of Applied Psychology*, 101: 1082-1096.

Cheng, C. Y., Jiang, D. Y., Cheng, B. S., Riley, J. H., & Jen, C. K. 2015. When do subordinates commit to their supervisors? Different effects of perceived supervisor integrity and support on Chinese and American employees. *The Leadership Quarterly*, 26: 81-97.

Christian, M. S., Eisenkraft, N., & Kapadia, C. 2015. Dynamic associations among somatic complaints, human energy, and discretionary behaviors: Experiences with pain fluctuations at work. *Administrative Science Quarterly*, 60: 66-102.

Chua, R. Y. 2013. The costs of ambient cultural disharmony: Indirect intercultural conflicts in social environment undermine creativity. *Academy of Management Journal*, 56: 1545-1577.

Chua, R. Y. 2015. Innovating at cultural crossroads how multicultural social networks promote idea flow and creativity. *Journal of Management*, 44: 1119-1146.

Coffman, K. B., Coffman, L. C., & Ericson, K. M. M. 2016. The size of the LGBT population and the magnitude of antigay sentiment are substantially underestimated. *Management Science*, 63: 3168-3186.

Cojuharenco, I., Patient, D., & Bashshur, M. R. 2011. Seeing the “forest” or the “trees” of organizational justice: Effects of temporal perspective on employee concerns about unfair treatment at work. *Organizational Behavior and Human Decision Processes*, 116: 17-31.

Colbert, A. E., Bono, J. E., & Purvanova, R. K. 2016. Flourishing via workplace relationships: Moving beyond instrumental support. *Academy of Management Journal*, 59: 1199-1223.

Connelly, C. E., Zweig, D., Webster, J., & Trougakos, J. P. 2012. Knowledge hiding in organizations. *Journal of Organizational Behavior*, 33: 64-88.

- Courtright, S. H., Gardner, R. G., Smith, T. A., McCormick, B. W., & Colbert, A. E. 2016. My family made me do it: A cross-domain, self-regulatory perspective on antecedents to abusive supervision. *Academy of Management Journal*, 59: 1630-1652.
- Credé, M., & Harms, P. D. 2015. 25 years of higher-order confirmatory factor analysis in the organizational sciences: A critical review and development of reporting recommendations. *Journal of Organizational Behavior*, 36: 845-872.
- Crilly, D., Ni, N., & Jiang, Y. 2016. Do-no-harm versus do-good social responsibility: Attributional thinking and the liability of foreignness. *Strategic Management Journal*, 37: 1316-1329.
- Crilly, D. 2017. Time and space in strategy discourse: Implications for intertemporal choice. *Strategic Management Journal*, 38: 2370-2389.
- Crossley, C. D., Bennett, R. J., Jex, S. M., & Burnfield, J. L. 2007. Development of a global measure of job embeddedness and integration into a traditional model of voluntary turnover. *Journal of Applied Psychology*, 92: 1031-1042.
- Cryder, C. E., Loewenstein, G., & Scheines, R. 2013. The donor is in the details. *Organizational Behavior and Human Decision Processes*, 120: 15-23.
- Dahl, D. W., Fuchs, C., & Schreier, M. 2014. Why and when consumers prefer products of user-driven firms: A social identification account. *Management Science*, 61: 1978-1988.
- Dahling, J. J., Wiley, S., Fishman, Z. A., & Loihle, A. 2016. A stake in the fight: When do heterosexual employees resist organizational policies that deny marriage equality to LGB peers? *Organizational Behavior and Human Decision Processes*, 132: 1-15.
- Dahling, J. J., & Gutworth, M. B. 2017. Loyal rebels? A test of the normative conflict model of constructive deviance. *Journal of Organizational Behavior*, 38: 1167-1182.

- Dai, H., Milkman, K. L., & Riis, J. 2014. The fresh start effect: temporal landmarks motivate aspirational behavior. *Management Science*, 60: 2563-2582.
- Daniels, D. P., Neale, M. A., & Greer, L. L. 2017. Spillover bias in diversity judgment. *Organizational Behavior and Human Decision Processes*, 139: 92-105.
- Danilov, A., & Sliwka, D. 2016. Can contracts signal social norms? Experimental evidence. *Management Science*, 63: 459-476.
- Dawson, K. M., O'Brien, K. E., & Beehr, T. A. 2016. The role of hindrance stressors in the job demand–control–support model of occupational stress: A proposed theory revision. *Journal of Organizational Behavior*, 37: 397-415.
- DeCelles, K. A., DeRue, D. S., Margolis, J. D., & Ceranic, T. L. 2012. Does power corrupt or enable? When and why power facilitates self-interested behavior. *Journal of Applied Psychology*, 97: 681-689.
- De Dreu, C. K., & Nauta, A. 2009. Self-interest and other-orientation in organizational behavior: implications for job performance, prosocial behavior, and personal initiative. *Journal of Applied Psychology*, 94: 913-926.
- De Langhe, B., & Puntoni, S. 2014. Bang for the buck: Gain-loss ratio as a driver of judgment and choice. *Management Science*, 61: 1137-1163.
- DeKay, M. L., Miller, S. A., Schley, D. R., & Erford, B. M. 2014. Proleader and antitrailer information distortion and their effects on choice and postchoice memory. *Organizational Behavior and Human Decision Processes*, 125: 134-150.
- Derfler-Rozin, R., Moore, C., & Staats, B. R. 2016. Reducing organizational rule breaking through task variety: how task design supports deliberative thinking. *Organization Science*, 27: 1361-1379.

- Desai, S. D., & Kouchaki, M. 2015. Work-report formats and overbilling: how unit-reporting vs. cost-reporting increases accountability and decreases overbilling. *Organizational Behavior and Human Decision Processes*, 130: 79-88.
- Desai, S. D., & Kouchaki, M. 2017. Moral symbols: A necklace of garlic against unethical requests. *Academy of Management Journal*, 60: 7-28.
- Desmet, P. T., Hoogervorst, N., & Van Dijke, M. 2015. Prophets vs. profits: How market competition influences leaders' disciplining behavior towards ethical transgressions. *The Leadership Quarterly*, 26: 1034-1050.
- DeVoe, S. E., & Pfeffer, J. 2007. When time is money: The effect of hourly payment on the evaluation of time. *Organizational Behavior and Human Decision Processes*, 104: 1-13.
- Diamantopoulos, A., Florack, A., Halkias, G., & Palcu, J. 2017. Explicit versus implicit country stereotypes as predictors of product preferences: Insights from the stereotype content model. *Journal of International Business Studies*, 48: 1023-1036.
- Dillon, R. L., Tinsley, C. H., Madsen, P. M., & Rogers, E. W. 2016. Organizational correctives for improving recognition of near-miss events. *Journal of Management*, 42: 671-697.
- Dionisi, A. M., & Barling, J. 2015. Spillover and crossover of sex-based harassment from work to home: Supervisor gender harassment affects romantic relationship functioning via targets' anger. *Journal of Organizational Behavior*, 36: 196-215.
- Direnzo, M. S., Greenhaus, J. H., & Weer, C. H. 2015. Relationship between protean career orientation and work-life balance: A resource perspective. *Journal of Organizational Behavior*, 36: 538-560.

- Djurdjevic, E., Stoverink, A. C., Klotz, A. C., Koopman, J., da Motta Veiga, S. P., Yam, K. C., & Chiang, J. T. J. 2017. Workplace status: The development and validation of a scale. *Journal of Applied Psychology*, 102: 1124-1147.
- Dong, Y., Liao, H., Chuang, A., Zhou, J., & Campbell, E. M. 2015. Fostering employee service creativity: Joint effects of customer empowering behaviors and supervisory empowering leadership. *Journal of Applied Psychology*, 100: 1364-1380.
- Dong, Y., Bartol, K. M., Zhang, Z. X., & Li, C. 2017. Enhancing employee creativity via individual skill development and team knowledge sharing: Influences of dual-focused transformational leadership. *Journal of Organizational Behavior*, 38: 439-458.
- Dragoni, L., Park, H., Soltis, J., & Forte-Trammell, S. 2014. Show and tell: How supervisors facilitate leader development among transitioning leaders. *Journal of Applied Psychology*, 99: 66-86.
- Duguid, M. M., & Thomas-Hunt, M. C. 2015. Condoning stereotyping? How awareness of stereotyping prevalence impacts expression of stereotypes. *Journal of Applied Psychology*, 100: 343-359.
- Dumas, T. L., Phillips, K. W., & Rothbard, N. P. 2013. Getting closer at the company party: Integration experiences, racial dissimilarity, and workplace relationships. *Organization Science*, 24: 1377-1401.
- Dutta, S., & Rao, H. 2015. Infectious diseases, contamination rumors and ethnic violence: Regimental mutinies in the Bengal Native Army in 1857 India. *Organizational Behavior and Human Decision Processes*, 129: 36-47.

- Eberly, M. B., Holley, E. C., Johnson, M. D., & Mitchell, T. R. 2017. It's not me, it's not you, it's us! An empirical examination of relational attributions. *Journal of Applied Psychology*, 102: 711-731.
- Edelman, B., & Larkin, I. 2014. Social comparisons and deception across workplace hierarchies: Field and experimental evidence. *Organization Science*, 26: 78-98.
- Effron, D. A., & Miller, D. T. 2015. Do as I say, not as I've done: Suffering for a misdeed reduces the hypocrisy of advising others against it. *Organizational Behavior and Human Decision Processes*, 131: 16-32.
- Effron, D. A., Lucas, B. J., & O'Connor, K. 2015. Hypocrisy by association: When organizational membership increases condemnation for wrongdoing. *Organizational Behavior and Human Decision Processes*, 130: 147-159.
- Egan, M., Daly, M., Delaney, L., Boyce, C. J., & Wood, A. M. 2017. Adolescent conscientiousness predicts lower lifetime unemployment. *Journal of Applied Psychology*, 1024, 700-709.
- Ellingson, J. E., Tews, M. J., & Dachner, A. M. 2016. Constituent attachment and voluntary turnover in low-wage/low-skill service work. *Journal of Applied Psychology*, 101: 129-140.
- Erdogan, B., Bauer, T. N., & Walter, J. 2015. Deeds that help and words that hurt: Helping and gossip as moderators of the relationship between leader-member exchange and advice network centrality. *Personnel Psychology*, 68: 185-214.
- Eriksson, K., Strimling, P., & Coultas, J. C. 2015. Bidirectional associations between descriptive and injunctive norms. *Organizational Behavior and Human Decision Processes*, 129: 59-69.

- Evers, E. R., Inbar, Y., Blanken, I., & Oosterwijk, L. D. 2017. When do people prefer carrots to sticks? A robust “matching effect” in policy evaluation. *Management Science*, 63: 4261-4276.
- Fast, N. J., Sivanathan, N., Mayer, N. D., & Galinsky, A. D. 2012. Power and overconfident decision-making. *Organizational Behavior and Human Decision Processes*, 117: 249-260.
- Fehr, R., Yam, K. C., He, W., Chiang, J. T. J., & Wei, W. 2017. Polluted work: A self-control perspective on air pollution appraisals, organizational citizenship, and counterproductive work behavior. *Organizational Behavior and Human Decision Processes*, 143: 98-110.
- Ferguson, M., Carlson, D., & Kacmar, K. M. 2015. Flexing work boundaries: The spillover and crossover of workplace support. *Personnel Psychology*, 68: 581-614.
- Ferguson, M., Carlson, D., Boswell, W., Whitten, D., Butts, M. M., & Kacmar, K. M. 2016. Tethered to work: A family systems approach linking mobile device use to turnover intentions. *Journal of Applied Psychology*, 101: 520-534.
- Fernbach, P. M., Hagmayer, Y., & Sloman, S. A. 2014. Effort denial in self-deception. *Organizational Behavior and Human Decision Processes*, 123: 1-8.
- Ferris, D. L., Johnson, R. E., Rosen, C. C., Djurdjevic, E., Chang, C. H. D., & Tan, J. A. 2013. When is success not satisfying? Integrating regulatory focus and approach/avoidance motivation theories to explain the relation between core self-evaluation and job satisfaction. *Journal of Applied Psychology*, 98: 342-353.
- Fonti, F., Maoret, M., & Whitbred, R. 2017. Free-riding in multi-party alliances: The role of perceived alliance effectiveness and peers' collaboration in a research consortium. *Strategic Management Journal*, 38: 363-383.

- Foulk, T. A., & Long, D. M. 2016. Impressed by impression management: Newcomer reactions to ingratiated supervisors. *Journal of Applied Psychology*, 101: 1487-1497.
- Fragale, A. R., Sumanth, J. J., Tiedens, L. Z., & Northcraft, G. B. 2012. Appeasing equals: Lateral deference in organizational communication. *Administrative Science Quarterly*, 57: 373-406.
- Franke, N., Keinz, P., & Klausberger, K. 2013. "Does this sound like a fair deal?": Antecedents and consequences of fairness expectations in the individual's decision to participate in firm innovation. *Organization Science*, 24: 1495-1516.
- Ganegoda, D. B., & Folger, R. 2015. Framing effects in justice perceptions: Prospect theory and counterfactuals. *Organizational Behavior and Human Decision Processes*, 126: 27-36.
- Gehman, J., & Grimes, M. 2017. Hidden badge of honor: how contextual distinctiveness affects category promotion among certified B corporations. *Academy of Management Journal*, 60: 2294-2320.
- Gineikiene, J., & Diamantopoulos, A. 2017. I hate where it comes from but I still buy it: Countervailing influences of animosity and nostalgia. *Journal of International Business Studies*, 48: 992-1008.
- Gladstone, E., & O'Connor, K. M. 2014. A counterpart's feminine face signals cooperativeness and encourages negotiators to compete. *Organizational Behavior and Human Decision Processes*, 125: 18-25.
- Gneezy, U., Imas, A., & Madarász, K. 2014. Conscience accounting: Emotion dynamics and social behavior. *Management Science*, 60: 2645-2658.

- Goncalo, J. A., Chatman, J. A., Duguid, M. M., & Kennedy, J. A. 2015. Creativity from constraint? How the political correctness norm influences creativity in mixed-sex work groups. *Administrative Science Quarterly*, 60: 1-30.
- Greenberg, J., & Mollick, E. 2017. Activist choice homophily and the crowdfunding of female founders. *Administrative Science Quarterly*, 62: 341-374.
- Gu, J., McFerran, B., Aquino, K., & Kim, T. G. 2014. What makes affirmative action-based hiring decisions seem unfair? A test of an ideological explanation for fairness judgments. *Journal of Organizational Behavior*, 35: 722-745.
- Guarana, C. L., & Hernandez, M. 2016. Identified ambivalence: When cognitive conflicts can help individuals overcome cognitive traps. *Journal of Applied Psychology*, 101: 1013-1029.
- Guillén, L., Mayo, M., & Korotov, K. 2015. Is leadership a part of me? A leader identity approach to understanding the motivation to lead. *The Leadership Quarterly*, 26: 802-820.
- Gupta, N., Ganster, D. C., & Kepes, S. 2013. Assessing the validity of sales self-efficacy: A cautionary tale. *Journal of Applied Psychology*, 98: 690-700.
- Hadley, C. N., Pittinsky, T. L., Sommer, S. A., & Zhu, W. 2011. Measuring the efficacy of leaders to assess information and make decisions in a crisis: The C-LEAD scale. *The Leadership Quarterly*, 22: 633-648.
- Hahl, O. 2016. Turning back the clock in baseball: The increased prominence of extrinsic rewards and demand for authenticity. *Organization Science*, 27: 929-953.
- Hanek, K. J., Garcia, S. M., & Tor, A. 2016. Gender and competitive preferences: The role of competition size. *Journal of Applied Psychology*, 101: 1122-1133.

- Haran, U. 2013. A person–organization discontinuity in contract perception: Why corporations can get away with breaking contracts but individuals cannot. *Management Science*, 59: 2837-2853.
- Hardisty, D. J., & Pfeffer, J. 2016. Intertemporal uncertainty avoidance: When the future is uncertain, people prefer the present, and when the present is uncertain, people prefer the future. *Management Science*, 63: 519-527.
- Harmon, D. J., Kim, P. H., & Mayer, K. J. 2015. Breaking the letter vs. spirit of the law: How the interpretation of contract violations affects trust and the management of relationships. *Strategic Management Journal*, 36: 497-517.
- Harold, C. M., & Holtz, B. C. 2015. The effects of passive leadership on workplace incivility. *Journal of Organizational Behavior*, 36: 16-38.
- Harold, C. M., Oh, I. S., Holtz, B. C., Han, S., & Giacalone, R. A. 2016. Fit and frustration as drivers of targeted counterproductive work behaviors: A multifoci perspective. *The Journal of Applied Psychology*, 101: 1513-1535.
- Harris, M. M., Anseel, F., & Lievens, F. 2008. Keeping up with the Joneses: A field study of the relationships among upward, lateral, and downward comparisons and pay level satisfaction. *Journal of Applied Psychology*, 93: 665-673.
- Hasan, S., Ferguson, J. P., & Koning, R. 2015. The lives and deaths of jobs: Technical interdependence and survival in a job structure. *Organization Science*, 26: 1665-1681.
- Hausknecht, J. P., Sturman, M. C., & Roberson, Q. M. 2011. Justice as a dynamic construct: effects of individual trajectories on distal work outcomes. *Journal of Applied Psychology*, 96: 872-880.

- Hekman, D. R., Johnson, S. K., Foo, M. D., & Yang, W. 2017. Does diversity-valuing behavior result in diminished performance ratings for non-white and female leaders?. *Academy of Management Journal*, 60: 771-797.
- Hernandez, M., Avery, D. R., Tonidandel, S., Hebl, M. R., Smith, A. N., & McKay, P. F. 2016. The role of proximal social contexts: Assessing stigma-by-association effects on leader appraisals. *Journal of Applied Psychology*, 101: 68-85.
- Hershcovis, M. S., & Barling, J. 2010. Comparing Victim Attributions and Outcomes for Workplace Aggression and Sexual Harassment. *Journal of Applied Psychology*, 95: 874-888.
- Hershcovis, M. S., & Bhatnagar, N. 2017. When fellow customers behave badly: Witness reactions to employee mistreatment by customers. *Journal of Applied Psychology*, 102: 1528-1544.
- Hershcovis, M. S., Neville, L., Reich, T. C., Christie, A. M., Cortina, L. M., & Shan, J. V. 2017. Witnessing wrongdoing: The effects of observer power on incivility intervention in the workplace. *Organizational Behavior and Human Decision Processes*, 142: 45-57.
- Hershcovis, M. S., Ogunfowora, B., Reich, T. C., & Christie, A. M. 2017. Targeted workplace incivility: The roles of belongingness, embarrassment, and power. *Journal of Organizational Behavior*, 38: 1057-1075.
- Hershfield, H. E., Cohen, T. R., & Thompson, L. 2012. Short horizons and tempting situations: Lack of continuity to our future selves leads to unethical decision making and behavior. *Organizational Behavior and Human Decision Processes*, 117: 298-310.

- Hertel, G., Rauschenbach, C., Thielgen, M. M., & Krumm, S. 2015. Are older workers more active copers? Longitudinal effects of age-contingent coping on strain at work. *Journal of Organizational Behavior*, 36: 514-537.
- Hewlin, P. F., Dumas, T. L., & Burnett, M. F. 2017. To thine own self be true? Facades of conformity, values incongruence, and the moderating impact of leader integrity. *Academy of Management Journal*, 60: 178-199.
- Hideg, I., & Ferris, D. L. 2017. Dialectical thinking and fairness-based perspectives of affirmative action. *Journal of Applied Psychology*, 102: 782-801.
- Hildreth, J. A. D., Gino, F., & Bazerman, M. 2016. Blind loyalty? When group loyalty makes us see evil or engage in it. *Organizational Behavior and Human Decision Processes*, 132: 16-36.
- Hillebrandt, A., & Barclay, L. J. 2017. Comparing integral and incidental emotions: Testing insights from emotions as social information theory and attribution theory. *Journal of Applied Psychology*, 102: 732-752.
- Ho, V. T., & Kong, D. T. 2015. Exploring the signaling function of idiosyncratic deals and their interaction. *Organizational Behavior and Human Decision Processes*, 131: 149-161.
- Holtz, B. C. 2015. From first impression to fairness perception: Investigating the impact of initial trustworthiness beliefs. *Personnel Psychology*, 68: 499-546.
- Holtz, B. C., & Harold, C. M. 2013. Effects of leadership consideration and structure on employee perceptions of justice and counterproductive work behavior. *Journal of Organizational Behavior*, 34: 492-519.
- Holtz, B. C., & Harold, C. M. 2013. Interpersonal justice and deviance the moderating effects of interpersonal justice values and justice orientation. *Journal of Management*, 39: 339-365.

Howell, T. M., Harrison, D. A., Burris, E. R., & Detert, J. R. 2015. Who gets credit for input?

Demographic and structural status cues in voice recognition. *Journal of Applied Psychology*, 100: 1765-1784.

Huang, J. L., Cropanzano, R., Li, A., Shao, P., Zhang, X.-a., & Li, Y. 2017. Employee conscientiousness, agreeableness, and supervisor justice rule compliance: A three-study investigation. *Journal of Applied Psychology*, 102: 1564-1589.

Huang, L., Gibson, C. B., Kirkman, B. L., & Shapiro, D. L. 2017. When is traditionalism an asset and when is it a liability for team innovation? A two-study empirical examination. *Journal of International Business Studies*, : 693-715.

Huang, L., Gino, F., & Galinsky, A. D. 2015. The highest form of intelligence: Sarcasm increases creativity for both expressers and recipients. *Organizational Behavior and Human Decision Processes*, 131: 162-177.

Huang, S. C., Jin, L., & Zhang, Y. 2017. Step by step: Sub-goals as a source of motivation. *Organizational Behavior and Human Decision Processes*, 141: 1-15.

Huber, J., Viscusi, W. K., & Bell, J. 2008. Reference dependence in iterative choices. *Organizational Behavior and Human Decision Processes*, 106: 143-152.

Imai, L., & Gelfand, M. J. 2010. The culturally intelligent negotiator: The impact of cultural intelligence CQ on negotiation sequences and outcomes. *Organizational Behavior and Human Decision Processes*, 112: 83-98.

Inesi, M. E. 2010. Power and loss aversion. *Organizational Behavior and Human Decision Processes*, 112: 58-69.

- Inesi, M. E., & Cable, D. M. 2015. When accomplishments come back to haunt you: The negative effect of competence signals on women's performance evaluations. *Personnel Psychology*, 68: 615-657.
- Inness, M., LeBlanc, M. M., & Barling, J. 2008. Psychosocial predictors of supervisor-, peer-, subordinate-, and service-provider-targeted aggression. *Journal of Applied Psychology*, 93: 1401-1411.
- Jacquart, P., & Antonakis, J. 2015. When does charisma matter for top-level leaders? Effect of attributional ambiguity. *Academy of Management Journal*, 58: 1051-1074.
- Jang, S. 2017. Cultural brokerage and creative performance in multicultural teams. *Organization Science*, 28: 993-1009.
- Jarnebrant, P., Toubia, O., & Johnson, E. 2009. The silver lining effect: Formal analysis and experiments. *Management Science*, 55: 1832-1841.
- Jia, J. S., Khan, U., & Litt, A. 2015. The effect of self-control on the construction of risk perceptions. *Management Science*, 61: 2259-2280.
- Jiang, L., & Probst, T. M. 2017. The rich get richer and the poor get poorer: Country-and state-level income inequality moderates the job insecurity-burnout relationship. *Journal of Applied Psychology*, 102: 672-681.
- Johnson, R. E., Lanaj, K., & Barnes, C. M. 2014. The good and bad of being fair: Effects of procedural and interpersonal justice behaviors on regulatory resources. *Journal of Applied Psychology*, 99: 635.
- Johnson, R. E., King, D. D., Lin, S. H. J., Scott, B. A., Walker, E. M. J., & Wang, M. 2017. Regulatory focus trickle-down: How leader regulatory focus and behavior shape follower regulatory focus. *Organizational Behavior and Human Decision Processes*, 140: 29-45.

- Johnson, R. E., Rosen, C. C., & Djurdjevic, E. 2011. Assessing the impact of common method variance on higher order multidimensional constructs. *Journal of Applied Psychology*, 96: 744-761.
- Jones, S. L., & Shah, P. P. 2016. Diagnosing the locus of trust: A temporal perspective for trustor, trustee, and dyadic influences on perceived trustworthiness. *Journal of Applied Psychology*, 101: 392-414.
- Juanchich, M., Sirota, M., & Butler, C. L. 2012. The perceived functions of linguistic risk quantifiers and their effect on risk, negativity perception and decision making. *Organizational Behavior and Human Decision Processes*, 118: 72-81.
- Judge, T. A., Ilies, R., & Scott, B. A. 2006. Work–family conflict and emotions: Effects at work and at home. *Personnel Psychology*, 59: 779-814.
- Jung, E. J., & Lee, S. 2015. The combined effects of relationship conflict and the relational self on creativity. *Organizational Behavior and Human Decision Processes*, 130: 44-57.
- Kakkar, H., Tangirala, S., Srivastava, N. K., & Kamdar, D. 2016. The dispositional antecedents of promotive and prohibitive voice. *Journal of Applied Psychology*, 101: 1342-1351.
- Kaptein, M. 2008. Developing a measure of unethical behavior in the workplace: A stakeholder perspective. *Journal of Management*, 34: 978-1008.
- Kapoutsis, I., Papalexandris, A., Treadway, D. C., & Bentley, J. 2017. Measuring political will in organizations: Theoretical construct development and empirical validation. *Journal of Management*, 43: 2252-2280.
- Kaufmann, C., Weber, M., & Haisley, E. 2013. The role of experience sampling and graphical displays on one's investment risk appetite. *Management Science*, 59: 323-340.

- Kausel, E. E., Culbertson, S. S., Leiva, P. I., Slaughter, J. E., & Jackson, A. T. 2015. Too arrogant for their own good? Why and when narcissists dismiss advice. *Organizational Behavior and Human Decision Processes*, 131: 33-50.
- Kennedy, J. A., Anderson, C., & Moore, D. A. 2013. When overconfidence is revealed to others: Testing the status-enhancement theory of overconfidence. *Organizational Behavior and Human Decision Processes*, 122: 266-279.
- Kennedy, J. A., Kray, L. J., & Ku, G. 2017. A social-cognitive approach to understanding gender differences in negotiator ethics: The role of moral identity. *Organizational Behavior and Human Decision Processes*, 138: 28-44.
- Keum, D. D., & See, K. E. 2017. The Influence of Hierarchy on Idea Generation and Selection in the Innovation Process. *Organization Science*, 28: 653-669.
- Kilduff, G. J., Galinsky, A. D., Gallo, E., & Reade, J. J. 2016. Whatever it takes to win: Rivalry increases unethical behavior. *Academy of Management Journal*, 59: 1508-1534.
- Kim, H., Lee, K., & Park, K. 2015. Balancing out feelings of risk by playing it safe: The effect of social networking on subsequent risk judgment. *Organizational Behavior and Human Decision Processes*, 131: 121-131.
- King, S. P., & Bryant, F. B. 2017. The Workplace Intergenerational Climate Scale WICS: A self-report instrument measuring ageism in the workplace. *Journal of Organizational Behavior*, 38: 124-151.
- Kinias, Z., & Sim, J. 2016. Facilitating women's success in business: Interrupting the process of stereotype threat through affirmation of personal values. *Journal of Applied Psychology*, 101: 1585-1597.

- Klotz, A. C., & Bolino, M. C. 2016. Saying goodbye: The nature, causes, and consequences of employee resignation styles. *Journal of Applied Psychology*, 101: 1386-1404.
- Knight, A. P. 2013. Mood at the midpoint: Affect and change in exploratory search over time in teams that face a deadline. *Organization Science*, 26: 99-118.
- Kollée, J. A., Giessner, S. R., & van Knippenberg, D. 2013. Leader evaluations after performance feedback: The role of follower mood. *The Leadership Quarterly*, 24: 203-214.
- Koopman, J., Matta, F. K., Scott, B. A., & Conlon, D. E. 2015. Ingratiation and popularity as antecedents of justice: A social exchange and social capital perspective. *Organizational Behavior and Human Decision Processes*, 131: 132-148.
- Koopmann, J., Lanaj, K., Bono, J., & Campana, K. 2016. Daily shifts in regulatory focus: The influence of work events and implications for employee well-being. *Journal of Organizational Behavior*, 37: 1293-1316.
- Kouchaki, M., & Desai, S. D. 2015. Anxious, threatened, and also unethical: How anxiety makes individuals feel threatened and commit unethical acts. *Journal of Applied Psychology*, 100: 360-375.
- Kouchaki, M., & Wareham, J. 2015. Excluded and behaving unethically: Social exclusion, physiological responses, and unethical behavior. *Journal of Applied Psychology*, 100: 547-556.
- Kovács, B., Carroll, G. R., & Lehman, D. W. 2013. Authenticity and consumer value ratings: Empirical tests from the restaurant domain. *Organization science*, 25: 458-478.

- Kray, L. J., Kennedy, J. A., & Van Zant, A. B. 2014. Not competent enough to know the difference? Gender stereotypes about women's ease of being misled predict negotiator deception. *Organizational Behavior and Human Decision Processes*, 125: 61-72.
- Kuechle, G., Boulu-Reshef, B., & Carr, S. D. 2016. Prediction- and control- based strategies in entrepreneurship: The role of information. *Strategic Entrepreneurship Journal*, 10: 43-64.
- Lambert, L. S., Tepper, B. J., Carr, J. C., Holt, D. T., & Barelka, A. J. 2012. Forgotten but not gone: an examination of fit between leader consideration and initiating structure needed and received. *Journal of Applied Psychology*, 97: 913-930.
- Lanaj, K., Johnson, R. E., & Barnes, C. M. 2014. Beginning the workday yet already depleted? Consequences of late-night smartphone use and sleep. *Organizational Behavior and Human Decision Processes*, 124: 11-23.
- Lee, A. J., & Ames, D. R. 2017. "I can't pay more" versus "It's not worth more": Divergent effects of constraint and disparagement rationales in negotiations. *Organizational Behavior and Human Decision Processes*, 141: 16-28.
- Lee, J. J., & Gino, F. 2015. Poker-faced morality: Concealing emotions leads to utilitarian decision making. *Organizational Behavior and Human Decision Processes*, 126: 49-64.
- Lee, J. J., Gino, F., & Staats, B. R. 2014. Rainmakers: Why bad weather means good productivity. *Journal of Applied Psychology*, 99: 504-513.
- Lee, K., Scandura, T. A., & Sharif, M. M. 2014. Cultures have consequences: A configural approach to leadership across two cultures. *The Leadership Quarterly*, 25: 692-710.

- Lee, S. Y., Pitesa, M., Thau, S., & Pillutla, M. M. 2015. Discrimination in selection decisions: Integrating stereotype fit and interdependence theories. *Academy of Management Journal*, 58: 789-812.
- Lee, S., Pitesa, M., Pillutla, M., & Thau, S. 2015. When beauty helps and when it hurts: An organizational context model of attractiveness discrimination in selection decisions. *Organizational Behavior and Human Decision Processes*, 128: 15-28.
- Leroy, S., Shipp, A. J., Blount, S., & Licht, J. G. 2015. Synchrony preference: Why some people go with the flow and some don't. *Personnel Psychology*, 68: 759-809.
- Leslie, L. M., Manchester, C. F., & Dahm, P. C. 2017. Why and when does the gender gap reverse? Diversity goals and the pay premium for high potential women. *Academy of Management Journal*, 60: 402-432.
- Levine, E. E., & Schweitzer, M. E. 2015. Prosocial lies: When deception breeds trust. *Organizational Behavior and Human Decision Processes*, 126: 88-106.
- Levine, E. E., & Schweitzer, M. E. 2015. The affective and interpersonal consequences of obesity. *Organizational Behavior and Human Decision Processes*, 127: 66-84.
- Li, J., Burch, T. C., & Lee, T. W. 2017. Intra-individual variability in job complexity over time: Examining the effect of job complexity trajectory on employee job strain. *Journal of Organizational Behavior*, : 671-691.
- Li, J. J., Lee, T. W., Mitchell, T. R., Hom, P. W., & Griffeth, R. W. 2016. The effects of proximal withdrawal states on job attitudes, job searching, intent to leave, and employee turnover. *Journal of Applied Psychology*, 101: 1436-1456.
- Li, M., & Chapman, G. B. 2013. A big fish or a small pond? Framing effects in percentages. *Organizational Behavior and Human Decision Processes*, 122: 190-199.

- Lindsey, A. P., Avery, D. R., Dawson, J. F., & King, E. B. 2017. Investigating why and for whom management ethnic representativeness influences interpersonal mistreatment in the workplace. *Journal of Applied Psychology*, 102: 1545-1563.
- Lieke, L., Johns, G., Lyons, B. J., & ter Hoeven, C. L. 2016. Why and when do employees imitate the absenteeism of co-workers? *Organizational Behavior and Human Decision Processes*, 134: 16-30.
- Lin, S. H. J., & Johnson, R. E. 2015. A suggestion to improve a day keeps your depletion away: Examining promotive and prohibitive voice behaviors within a regulatory focus and ego depletion framework. *Journal of Applied Psychology*, 100: 1381-1397.
- Lin, S. H. J., Ma, J., & Johnson, R. E. 2016. When ethical leader behavior breaks bad: How ethical leader behavior can turn abusive via ego depletion and moral licensing. *Journal of Applied Psychology*, 101: 815-830.
- Lin-Healy, F., & Small, D. A. 2012. Cheapened altruism: Discounting personally affected prosocial actors. *Organizational Behavior and Human Decision Processes*, 117: 269-274.
- Liu, P. J., Campbell, T. H., Fitzsimons, G. J., & Fitzsimons, G. M. 2013. Matching choices to avoid offending stigmatized group members. *Organizational Behavior and Human Decision Processes*, 122: 291-304.
- Liu, Z., Liu, X. X., Hong, Y. Y., Brockner, J., Tam, K. P., & Li, Y. M. 2017. Is individual bribery or organizational bribery more intolerable in China versus in the United States? Advancing theory on the perception of corrupt acts. *Organizational Behavior and Human Decision Processes*, 143: 111-128.

- Long, C. P., Bendersky, C., & Morrill, C. 2011. Fairness monitoring: Linking managerial controls and fairness judgments in organizations. *Academy of Management Journal*, 54: 1045-1068.
- Long, E. C., & Christian, M. S. 2015. Mindfulness buffers retaliatory responses to injustice: A regulatory approach. *Journal of Applied Psychology*, 100: 1409-1422.
- Lount Jr, R. B., Pettit, N. C., & Doyle, S. P. 2017. Motivating underdogs and favorites. *Organizational Behavior and Human Decision Processes*, 141: 82-93.
- Lount Jr, R. B., Sheldon, O. J., Rink, F., & Phillips, K. W. 2015. Biased perceptions of racially diverse teams and their consequences for resource support. *Organization Science*, 26: 1351-1364.
- Lu, J. G., Akinola, M., & Mason, M. F. 2017. "Switching On" creativity: Task switching can increase creativity by reducing cognitive fixation. *Organizational Behavior and Human Decision Processes*, 139: 63-75.
- Lu, J. G., Hafenbrack, A. C., Eastwick, P. W., Wang, D. J., Maddux, W. W., & Galinsky, A. D. 2017. "Going out" of the box: Close intercultural friendships and romantic relationships spark creativity, workplace innovation, and entrepreneurship. *Journal of Applied Psychology*, 102: 1091-1108.
- Lyngsie, J., & Foss, N. J. 2017. The more, the merrier? Women in top-management teams and entrepreneurship in established firms. *Strategic Management Journal*, 38: 487-505.
- Lyons, B. J., Volpone, S. D., Wessel, J. L., & Alonso, N. M. 2017. Disclosing a disability: Do strategy type and onset controllability make a difference? *Journal of Applied Psychology*, 102: 1375-1383.

- Ma, A., & Kay, A. C. 2017. Compensatory control and ambiguity intolerance. *Organizational Behavior and Human Decision Processes*, 140: 46-61.
- Mai, K. M., Ellis, A. P., Christian, J. S., & Porter, C. O. L. H. 2016. Examining the effects of turnover intentions on organizational citizenship behaviors and deviance behaviors: A psychological contract approach. *Journal of Applied Psychology*, 101: 1067-1081.
- Marchiondo, L. A., Myers, C. G., & Kopelman, S. 2015. The relational nature of leadership identity construction: How and when it influences perceived leadership and decision-making. *The Leadership Quarterly*, 26: 892-908.
- Marr, J. C., Thau, S., Aquino, K., & Barclay, L. J. 2012. Do I want to know? How the motivation to acquire relationship-threatening information in groups contributes to paranoid thought, suspicion behavior, and social rejection. *Organizational Behavior and Human Decision Processes*, 117: 285-297.
- Martin, A. E., & Phillips, K. W. 2017. What “blindness” to gender differences helps women see and do: Implications for confidence, agency, and action in male-dominated environments. *Organizational Behavior and Human Decision Processes*, 142: 28-44.
- Martinez, L. R., White, C. D., Shapiro, J. R., & Hebl, M. R. 2016. Selection BIAS: Stereotypes and discrimination related to having a history of cancer. *Journal of Applied Psychology*, 101: 122-128.
- Matta, F. K., Scott, B. A., Colquitt, J. A., Koopman, J., & Passantino, L. G. 2017. Is consistently unfair better than sporadically fair? An investigation of justice variability and stress. *Academy of Management Journal*, 60: 743-770.

Matthews, R. A., Wayne, J. H., & Ford, M. T. 2014. A work–family conflict/subjective well-being process model: A test of competing theories of longitudinal effects. *Journal of Applied Psychology*, 99: 1173-1187.

Mawritz, M. B., Greenbaum, R. L., Butts, M. M., & Graham, K. A. 2017. I just can't control myself: A self-regulation perspective on the abuse of deviant employees. *Academy of Management Journal*, 60: 1482-1503.

Mayer, D. M., Thau, S., Workman, K. M., Van Dijke, M., & De Cremer, D. 2012. Leader mistreatment, employee hostility, and deviant behaviors: Integrating self-uncertainty and thwarted needs perspectives on deviance. *Organizational Behavior and Human Decision Processes*, 117: 24-40.

McCarthy, J. M., Bauer, T. N., Truxillo, D. M., Campion, M. C., Van Iddekinge, C. H., & Campion, M. A. 2017. Using pre-test explanations to improve test-taker reactions: Testing a set of “wise” interventions. *Organizational Behavior and Human Decision Processes*, 141: 43-56.

McGonagle, A. K., Fisher, G. G., Barnes-Farrell, J. L., & Grosch, J. W. 2015. Individual and work factors related to perceived work ability and labor force outcomes. *Journal of Applied Psychology*, 100: 376-398.

McGraw, A. P., Todorov, A., & Kunreuther, H. 2011. A policy maker's dilemma: Preventing terrorism or preventing blame. *Organizational Behavior and Human Decision Processes*, 115: 25-34.

Meleady, R., & Crisp, R. J. 2017. Take it to the top: Imagined interactions with leaders elevates organizational identification. *The Leadership Quarterly*, 28: 621-638.

- Meyer, R. D., Dalal, R. S., José, I. J., Hermida, R., Chen, T. R., Vega, R. P., ... & Khare, V. P. 2014. Measuring job-related situational strength and assessing its interactive effects with personality on voluntary work behavior. *Journal of Management*, 40: 1010-1041.
- Milkman, K. L. 2012. Unsure what the future will bring? You may overindulge: Uncertainty increases the appeal of wants over shoulds. *Organizational Behavior and Human Decision Processes*, 119: 163-176.
- Milkman, K. L., Akinola, M., & Chugh, D. 2015. What happens before? A field experiment exploring how pay and representation differentially shape bias on the pathway into organizations. *Journal of Applied Psychology*, 100: 1678-1712.
- Miron-Spektor, E., Paletz, S. B., & Lin, C. C. 2015. To create without losing face: The effects of face cultural logic and social-image affirmation on creativity. *Journal of Organizational Behavior*, 36: 919-943.
- Mitchell, M. S., Vogel, R. M., & Folger, R. 2015. Third parties' reactions to the abusive supervision of coworkers. *Journal of Applied Psychology*, 100: 1040-1055.
- Mochon, D., & Frederick, S. 2013. Anchoring in sequential judgments. *Organizational Behavior and Human Decision Processes*, 122: 69-79.
- Montes, S. D., & Zweig, D. 2009. Do promises matter? An exploration of the role of promises in psychological contract breach. *Journal of Applied Psychology*, 94: 1243-1260.
- Moore, D. A., Carter, A. B., & Yang, H. H. 2015. Wide of the mark: Evidence on the underlying causes of overprecision in judgment. *Organizational Behavior and Human Decision Processes*, 131: 110-120.

- Moore, S. G., Neal, D. T., Fitzsimons, G. J., & Shiv, B. 2012. Wolves in sheep's clothing: How and when hypothetical questions influence behavior. *Organizational Behavior and Human Decision Processes*, 117: 168-178.
- Morrison, E. W., See, K. E., & Pan, C. 2015. An approach-inhibition model of employee silence: The joint effects of personal sense of power and target openness. *Personnel Psychology*, 68: 547-580.
- Motro, D., & Ellis, A. P. J. 2017. Boys, don't cry: Gender and reactions to negative performance feedback. *Journal of Applied Psychology*, 102: 227-235.
- Mulder, L. B., & Aquino, K. 2013. The role of moral identity in the aftermath of dishonesty. *Organizational Behavior and Human Decision Processes*, 121: 219-230.
- Mulder, L. B., Jordan, J., & Rink, F. 2015. The effect of specific and general rules on ethical decisions. *Organizational Behavior and Human Decision Processes*, 126: 115-129.
- Neubert, M. J., Kacmar, K. M., Carlson, D. S., Chonko, L. B., & Roberts, J. A. 2008. Regulatory focus as a mediator of the influence of initiating structure and servant leadership on employee behavior. *Journal of Applied Psychology*, 93: 1220-1233.
- Newark, D. A., Bohns, V. K., & Flynn, F. J. 2017. A helping hand is hard at work: Help-seekers' underestimation of helpers' effort. *Organizational Behavior and Human Decision Processes*, 139: 18-29.
- Nakashima, N. A., Daniels, D. P., & Laurin, K. 2017. It's about time: Divergent evaluations of restrictive policies in the near and distant future. *Organizational Behavior and Human Decision Processes*, 142: 12-27.
- Ng, T. W., & Feldman, D. C. 2010. The effects of organizational embeddedness on development of social capital and human capital. *Journal of Applied Psychology*, 95: 696-712.

- Ng, T. W., & Feldman, D. C. 2012. The effects of organizational and community embeddedness on work-to-family and family-to-work conflict. *Journal of Applied Psychology*, 97: 1233-1251.
- Ng, T. W., & Feldman, D. C. 2013. Age and innovation-related behavior: The joint moderating effects of supervisor undermining and proactive personality. *Journal of Organizational Behavior*, 34: 583-606.
- Ng, T. W., & Feldman, D. C. 2013. Changes in perceived supervisor embeddedness: Effects on employees' embeddedness, organizational trust, and voice behavior. *Personnel Psychology*, 66: 645-685.
- Ng, T. W., & Feldman, D. C. 2015. Idiosyncratic deals and voice behavior. *Journal of Management*, 41: 893-928.
- Nichols, A. L., & Cottrell, C. A. 2014. What do people desire in their leaders? The role of leadership level on trait desirability. *The Leadership Quarterly*, 25: 711-729.
- Obodaru, O. 2017. Forgone, but not forgotten: Toward a theory of forgone professional identities. *Academy of Management Journal*, 60: 523-553.
- Olivola, C. Y., Eubanks, D. L., & Lovelace, J. B. 2014. The many distinctive faces of leadership: Inferring leadership domain from facial appearance. *The Leadership Quarterly*, 25: 817-834.
- O'Reilly, J., Aquino, K., & Skarlicki, D. 2016. The lives of others: Third parties' responses to others' injustice. *Journal of Applied Psychology*, 101: 171-189.
- O'Reilly, J., Robinson, S. L., Berdahl, J. L., & Banki, S. 2014. Is negative attention better than no attention? The comparative effects of ostracism and harassment at work. *Organization Science*, 26: 774-793.

- Owens, B. P., Baker, W. E., Sumpter, D. M., & Cameron, K. S. 2016. Relational energy at work: Implications for job engagement and job performance. *Journal of Applied Psychology*, 101: 35-49.
- Paharia, N., Kassam, K. S., Greene, J. D., & Bazerman, M. H. 2009. Dirty work, clean hands: The moral psychology of indirect agency. *Organizational Behavior and Human Decision Processes*, 109: 134-141.
- Paharia, N., Vohs, K. D., & Deshpandé, R. 2013. Sweatshop labor is wrong unless the shoes are cute: Cognition can both help and hurt moral motivated reasoning. *Organizational Behavior and Human Decision Processes*, 121: 81-88.
- Palanski, M. E., & Yammarino, F. J. 2011. Impact of behavioral integrity on follower job performance: A three-study examination. *The Leadership Quarterly*, 22: 765-786.
- Palmeira, M., Spassova, G., & Keh, H. T. 2015. Other-serving bias in advice-taking: When advisors receive more credit than blame. *Organizational Behavior and Human Decision Processes*, 130: 13-25.
- Parke, M. R., Seo, M. G., & Sherf, E. N. 2015. Regulating and facilitating: The role of emotional intelligence in maintaining and using positive affect for creativity. *Journal of Applied Psychology*, 100: 917-934.
- Peng, A. C., & Zeng, W. 2017. Workplace ostracism and deviant and helping behaviors: The moderating role of 360 degree feedback. *Journal of Organizational Behavior*, 38: 833-855.
- Perry-Smith, J. E. 2014. Social network ties beyond nonredundancy: An experimental investigation of the effect of knowledge content and tie strength on creativity. *Journal of Applied Psychology*, 99: 831-846.

- Pettit, N. C., Doyle, S. P., Lount, R. B., & To, C. 2016. Cheating to get ahead or to avoid falling behind? The effect of potential negative versus positive status change on unethical behavior. *Organizational Behavior and Human Decision Processes*, 137: 172-183.
- Peus, C., Braun, S., & Frey, D. 2013. Situation-based measurement of the full range of leadership model—development and validation of a situational judgment test. *The Leadership Quarterly*, 24: 777-795.
- Peysakhovich, A., & Karmarkar, U. R. 2015. Asymmetric effects of favorable and unfavorable information on decision making under ambiguity. *Management Science*, 62: 2163-2178.
- Peysakhovich, A., & Rand, D. G. 2015. Habits of virtue: Creating norms of cooperation and defection in the laboratory. *Management Science*, 62: 631-647.
- Pham, M. T., Faraji-Rad, A., Toubia, O., & Lee, L. 2015. Affect as an ordinal system of utility assessment. *Organizational Behavior and Human Decision Processes*, 131: 81-94.
- Phillips, J. M., Gully, S. M., McCarthy, J. E., Castellano, W. G., & Kim, M. S. 2014. Recruiting global travelers: The role of global travel recruitment messages and individual differences in perceived fit, attraction, and job pursuit intentions. *Personnel Psychology*, 67: 153-201.
- Piccolo, R. F., & Colquitt, J. A. 2006. Transformational leadership and job behaviors: The mediating role of core job characteristics. *Academy of Management Journal*, 49: 327-340.
- Pitesa, M., & Thau, S. 2013. Masters of the universe: How power and accountability influence self-serving decisions under moral hazard. *Journal of Applied Psychology*, 98: 550-558.
- Pitesa, M., Thau, S., & Pillutla, M. M. 2013. Cognitive control and socially desirable behavior: The role of interpersonal impact. *Organizational Behavior and Human Decision Processes*, 122: 232-243.

- Polman, E. 2012. Self–other decision making and loss aversion. *Organizational Behavior and Human Decision Processes*, 119: 141-150.
- Polman, E., & Russo, J. E. 2012. Commitment to a developing preference and predecisional distortion of information. *Organizational Behavior and Human Decision Processes*, 119: 78-88.
- Porter, C. M., Woo, S. E., & Campion, M. A. 2016. Internal and external networking differentially predict turnover through job embeddedness and job offers. *Personnel Psychology*, 69: 653-672.
- Posavac, S. S., Kardes, F. R., & Brakus, J. J. 2010. Focus induced tunnel vision in managerial judgment and decision making: The peril and the antidote. *Organizational Behavior and Human Decision Processes*, 113: 102-111.
- Proudfoot, D., Kay, A. C., & Mann, H. 2015. Motivated employee blindness: The impact of labor market instability on judgment of organizational inefficiencies. *Organizational Behavior and Human Decision Processes*, 130: 108-122.
- Quade, M. J., Greenbaum, R. L., & Petrenko, O. V. 2017. “I don't want to be near you, unless...”: The interactive effect of unethical behavior and performance onto relationship conflict and workplace ostracism. *Personnel Psychology*, 70: 675-709.
- Quinn, R. W., & Bunderson, J. S. 2016. Could we huddle on this project? Participant learning in newsroom conversations. *Journal of Management*, 42: 386-418.
- Rader, C. A., Soll, J. B., & Larrick, R. P. 2015. Pushing away from representative advice: Advice taking, anchoring, and adjustment. *Organizational Behavior and Human Decision Processes*, 130: 26-43.

- Radzevick, J. R., & Moore, D. A. 2013. Just how comparative are comparative judgments? *Organizational Behavior and Human Decision Processes*, 122: 80-91.
- Ragins, B. R., Ehrhardt, K., Lyness, K. S., Murphy, D. D., & Capman, J. F. 2017. Anchoring relationships at work: High-quality mentors and other supportive work relationships as buffers to ambient racial discrimination. *Personnel Psychology*, 70: 211-256.
- Ragsdale, J. M., & Beehr, T. A. 2016. A rigorous test of a model of employees' resource recovery mechanisms during a weekend. *Journal of Organizational Behavior*, 37: 911-932.
- Rai, T. S., & Diermeier, D. 2015. Corporations are cyborgs: Organizations elicit anger but not sympathy when they can think but cannot feel. *Organizational Behavior and Human Decision Processes*, 126: 18-26.
- Ramarajan, L., Berger, I. E., & Greenspan, I. 2017. Multiple identity configurations: The benefits of focused enhancement for prosocial behavior. *Organization Science*, 28: 495-513.
- Ramarajan, L., Rothbard, N. P., & Wilk, S. L. 2017. Discordant vs. Harmonious Selves: The Effects of Identity Conflict and Enhancement on Sales Performance in Employee–Customer Interactions. *Academy of Management Journal*, 60: 2208-2238.
- Read, D., Olivola, C. Y., & Hardisty, D. J. 2016. The value of nothing: Asymmetric attention to opportunity costs drives intertemporal decision making. *Management Science*, 63: 4277-4297.
- Resick, C. J., Whitman, D. S., Weingarden, S. M., & Hiller, N. J. 2009. The bright-side and the dark-side of CEO personality: Examining core self-evaluations, narcissism,

- transformational leadership, and strategic influence. *Journal of Applied Psychology*, 94: 1365-1381.
- Reynolds, S. J. 2008. Moral attentiveness: Who pays attention to the moral aspects of life? *Journal of Applied Psychology*, 93: 1027-1041.
- Reynolds, S. J., & Ceranic, T. L. 2007. The effects of moral judgment and moral identity on moral behavior: An empirical examination of the moral individual. *Journal of Applied Psychology*, 92: 1610-1624.
- Reynolds, S. J., Dang, C. T., Yam, K. C., & Leavitt, K. 2014. The role of moral knowledge in everyday immorality: What does it matter if I know what is right? *Organizational Behavior and Human Decision Processes*, 123: 124-137.
- Reyt, J. N., & Wiesenfeld, B. M. 2015. Seeing the forest for the trees: Exploratory learning, mobile technology, and knowledge workers' role integration behaviors. *Academy of Management Journal*, 58: 739-762.
- Reyt, J. N., Wiesenfeld, B. M., & Trope, Y. 2016. Big picture is better: The social implications of construal level for advice taking. *Organizational Behavior and Human Decision Processes*, 135: 22-31.
- Richards, D. A., & Hackett, R. D. 2012. Attachment and emotion regulation: Compensatory interactions and leader-member exchange. *The Leadership Quarterly*, 23: 686-701.
- Richards, D. A., & Schat, A. C. 2011. Attachment at not to work: applying attachment theory to explain individual behavior in organizations. *Journal of Applied Psychology*, 96: 169-182.

- Ritova, I., & Zamir, E. 2014. Affirmative action and other group tradeoff policies: Identifiability of those adversely affected. *Organizational Behavior and Human Decision Processes*, 125: 50-60.
- Ritter, K. J., Matthews, R. A., Ford, M. T., & Henderson, A. A. 2016. Understanding role stressors and job satisfaction over time using adaptation theory. *Journal of Applied Psychology*, 101: 1655-1669.
- Robertson, J. L., & Barling, J. 2013. Greening organizations through leaders' influence on employees' pro-environmental behaviors. *Journal of Organizational Behavior*, 34: 176-194.
- Rodell, J. B., Colquitt, J. A., & Baer, M. D. 2017. Is adhering to justice rules enough? The role of charismatic qualities in perceptions of supervisors' overall fairness. *Organizational Behavior and Human Decision Processes*, 140: 14-28.
- Rogers, T., & Bazerman, M. H. 2008. Future lock-in: Future implementation increases selection of 'should' choices. *Organizational Behavior and Human Decision Processes*, 106: 1-20.
- Rosen, C. C., Ferris, D. L., Brown, D. J., Chen, Y., & Yan, M. 2013. Perceptions of organizational politics: A need satisfaction paradigm. *Organization Science*, 25: 1026-1055.
- Rosen, C. C., Slater, D. J., Chang, C. H., & Johnson, R. E. 2013. Let's make a deal: Development and validation of the ex post i-deals scale. *Journal of Management*, 39: 709-742.
- Rosette, A. S., Carton, A. M., Bowes-Sperry, L., & Hewlin, P. F. 2013. Why do racial slurs remain prevalent in the workplace? Integrating theory on intergroup behavior. *Organization Science*, 24: 1402-1421.

- Rosette, A. S., Koval, C. Z., Ma, A., & Livingston, R. 2016. Race matters for women leaders: Intersectional effects on agentic deficiencies and penalties. *The Leadership Quarterly*, 27: 429-445.
- Rosette, A. S., Mueller, J. S., & Lebel, R. D. 2015. Are male leaders penalized for seeking help? The influence of gender and asking behaviors on competence perceptions. *The Leadership Quarterly*, 26: 749-762.
- Rule, N. O., Bjornsdottir, R. T., Tskhay, K. O., & Ambady, N. 2016. Subtle perceptions of male sexual orientation influence occupational opportunities. *Journal of Applied Psychology*, 101: 1687-1704.
- Rule, N. O., & Tskhay, K. O. 2014. The influence of economic context on the relationship between chief executive officer facial appearance and company profits. *The Leadership Quarterly*, 25: 846-854.
- Rus, D., van Knippenberg, D., & Wisse, B. 2010. Leader self-definition and leader self-serving behavior. *The Leadership Quarterly*, 21: 509-529.
- Rus, D., van Knippenberg, D., & Wisse, B. 2012. Leader power and self-serving behavior: The moderating role of accountability. *The Leadership Quarterly*, 23: 13-26.
- Ruttan, R. L., & Nordgren, L. F. 2016. The strength to face the facts: Self-regulation defends against defensive information processing. *Organizational Behavior and Human Decision Processes*, 137: 86-98.
- Saqib, N. U., & Chan, E. Y. 2015. Time pressure reverses risk preferences. *Organizational Behavior and Human Decision Processes*, 130: 58-68.

- Saluja, G., Adaval, R., & Wyer, R. S. 2017. Hesitant to label, yet quick to judge: How cultural mindsets affect the accessibility of stereotypic knowledge when concepts of the elderly are primed. *Organizational Behavior and Human Decision Processes*, 143: 23-38.
- Savani, K., & King, D. 2015. Perceiving outcomes as determined by external forces: The role of event construal in attenuating the outcome bias. *Organizational Behavior and Human Decision Processes*, 130: 136-146.
- Savani, K., Wadhwa, M., Uchida, Y., Ding, Y., & Naidu, N. V. R. 2015. When norms loom larger than the self: Susceptibility of preference–choice consistency to normative influence across cultures. *Organizational Behavior and Human Decision Processes*, 129: 70-79.
- Schaerer, M., Loschelder, D. D., & Swaab, R. I. 2016. Bargaining zone distortion in negotiations: The elusive power of multiple alternatives. *Organizational Behavior and Human Decision Processes*, 137: 156-171.
- Schaubroeck, J. M., & Shao, P. 2012. The role of attribution in how followers respond to the emotional expression of male and female leaders. *The Leadership Quarterly*, 23: 27-42.
- Schaumberg, R. L., & Flynn, F. J. 2017. Self-reliance: A gender perspective on its relationship to communality and leadership evaluations. *Academy of Management Journal*, 60: 1859-1881.
- Schaumberg, R. L., & Flynn, F. J. 2017. Clarifying the link between job satisfaction and absenteeism: The role of guilt proneness. *Journal of Applied Psychology*, 102: 982-992.
- Schminke, M., Caldwell, J., Ambrose, M. L., & McMahon, S. R. 2014. Better than ever? Employee reactions to ethical failures in organizations, and the ethical recovery paradox. *Organizational Behavior and Human Decision Processes*, 123: 206-219.

- Scopelliti, I., Morewedge, C. K., McCormick, E., Min, H. L., Lebrecht, S., & Kassam, K. S. 2015. Bias blind spot: Structure, measurement, and consequences. *Management Science*, 61: 2468-2486.
- Scott, B. A., Garza, A. S., Conlon, D. E., & Kim, Y. J. 2014. Why do managers act fairly in the first place? A daily investigation of “hot” and “cold” motives and discretion. *Academy of Management Journal*, 57: 1571-1591.
- See, K. E., Morrison, E. W., Rothman, N. B., & Soll, J. B. 2011. The detrimental effects of power on confidence, advice taking, and accuracy. *Organizational Behavior and Human Decision Processes*, 116: 272-285.
- Seibert, S. E., Sargent, L. D., Kraimer, M. L., & Kiazad, K. 2017. Linking Developmental Experiences to Leader Effectiveness and Promotability: The Mediating Role of Leadership Self-Efficacy and Mentor Network. *Personnel Psychology*, 70: 357-397.
- Selenko, E., Mäkikangas, A., & Stride, C. B. 2017. Does job insecurity threaten who you are? Introducing a social identity perspective to explain well-being and performance consequences of job insecurity. *Journal of Organizational Behavior*, 38: 856-875.
- Sezer, O., Zhang, T., Gino, F., & Bazerman, M. H. 2016. Overcoming the outcome bias: Making intentions matter. *Organizational Behavior and Human Decision Processes*, 137: 13-26.
- Sharma, E., & Morwitz, V. G. 2016. Saving the masses: The impact of perceived efficacy on charitable giving to single vs. multiple beneficiaries. *Organizational Behavior and Human Decision Processes*, 135: 45-54.
- Sharma, E., Mazar, N., Alter, A. L., & Ariely, D. 2014. Financial deprivation selectively shifts moral standards and compromises moral decisions. *Organizational Behavior and Human Decision Processes*, 123: 90-100.

- Shea, C. T., & Fitzsimons, G. M. 2016. Personal goal pursuit as an antecedent to social network structure. *Organizational Behavior and Human Decision Processes*, 137: 45-57.
- Sherf, E. N., Tangirala, S., & Weber, K. C. 2017. It Is Not My Place! Psychological Standing and Men's Voice and Participation in Gender-Parity Initiatives. *Organization Science*, 28: 193-210.
- Sherf, E. N., & Venkataramani, V. 2015. Friend or foe? The impact of relational ties with comparison others on outcome fairness and satisfaction judgments. *Organizational Behavior and Human Decision Processes*, 128: 1-14.
- Shin, J., & Milkman, K. L. 2016. How backup plans can harm goal pursuit: The unexpected downside of being prepared for failure. *Organizational Behavior and Human Decision Processes*, 135: 1-9.
- Shipp, A. J., Edwards, J. R., & Lambert, L. S. 2009. Conceptualization and measurement of temporal focus: The subjective experience of the past, present, and future. *Organizational Behavior and Human Decision Processes*, 110: 1-22.
- Shirako, A., Kilduff, G. J., & Kray, L. J. 2015. Is there a place for sympathy in negotiation? Finding strength in weakness. *Organizational Behavior and Human Decision Processes*, 131: 95-109.
- Shockley, K. M., Ureksoy, H., Rodopman, O. B., Poteat, L. F., & Dullaghan, T. R. 2016. Development of a new scale to measure subjective career success: A mixed-methods study. *Journal of Organizational Behavior*, 37: 128-153.
- Sirola, N., & Pitesa, M. 2017. Economic downturns undermine workplace helping by promoting a zero-sum construal of success. *Academy of Management Journal*, 60: 1339-1359.

- Skarlicki, D. P., & Turner, R. A. 2014. Unfairness begets unfairness: Victim derogation bias in employee ratings. *Organizational Behavior and Human Decision Processes*, 124: 34-46.
- Smith, E. B., & Chae, H. 2017. The effect of organizational atypicality on reference group selection and performance evaluation. *Organization Science*, 28: 1134-1149.
- Spieler, I., Scheibe, S., Stamoov-Roßnagel, C., & Kappas, A. 2017. Help or hindrance? Day-level relationships between flextime use, work–nonwork boundaries, and affective well-being. *Journal of Applied Psychology*, 102: 67-87.
- Stam, D., van Knippenberg, D., Wisse, B., & Nederveen Pieterse, A. 2016. Motivation in words: Promotion-and prevention-oriented leader communication in times of crisis. *Journal of Management*, 1-29.
- Steffel, M., Williams, E. F., & Permann-Graham, J. 2016. Passing the buck: Delegating choices to others to avoid responsibility and blame. *Organizational Behavior and Human Decision Processes*, 135: 32-44.
- Steffens, N. K., Haslam, S. A., & Reicher, S. D. 2014. Up close and personal: Evidence that shared social identity is a basis for the ‘special’ relationship that binds followers to leaders. *The Leadership Quarterly*, 25: 296-313.
- Steffens, N. K., Haslam, S. A., Reicher, S. D., Platow, M. J., Fransen, K., Yang, J., ... & Boen, F. 2014. Leadership as social identity management: Introducing the Identity Leadership Inventory ILI to assess and validate a four-dimensional model. *The Leadership Quarterly*, 25: 1001-1024.
- Steffens, N. K., Mols, F., Haslam, S. A., & Okimoto, T. G. 2016. True to what We stand for: Championing collective interests as a path to authentic leadership. *The Leadership Quarterly*, 27: 726-744.

- Steffens, N. K., Peters, K., Haslam, S. A., & van Dick, R. 2017. Dying for charisma: Leaders' inspirational appeal increases post-mortem. *The Leadership Quarterly*, 28: 530-542.
- Stiglbauer, B. 2017. Under what conditions does job control moderate the relationship between time pressure and employee well-being? Investigating the role of match and personal control beliefs. *Journal of Organizational Behavior*, 38: 730-748.
- Strauss, K., Griffin, M. A., & Parker, S. K. 2012. Future work selves: How salient hoped-for identities motivate proactive career behaviors. *Journal of Applied Psychology*, 97: 580-598.
- Sturman, M. C., & Walsh, K. 2014. Strengthening the employment relationship: The effects of work-hours fit on key employee attitudes. *Journal of Organizational Behavior*, 35: 762-784.
- Swaab, R. I., Phillips, K. W., & Schaerer, M. 2016. Secret conversation opportunities facilitate minority influence in virtual groups: The influence on majority power, information processing, and decision quality. *Organizational Behavior and Human Decision Processes*, 133: 17-32.
- Sweldens, S., Puntoni, S., Paolacci, G., & Vissers, M. 2014. The bias in the bias: Comparative optimism as a function of event social undesirability. *Organizational Behavior and Human Decision Processes*, 124: 229-244.
- Tang, S., Morewedge, C. M., Larrick, R. P., & Klein, J. G. 2017. Disloyalty aversion: Greater reluctance to bet against close others than the self. *Organizational Behavior and Human Decision Processes*, 140: 1-13.
- Tannenbaum, D., Fox, C. R., & Ülkümen, G. 2016. Judgment extremity and accuracy under epistemic vs. aleatory uncertainty. *Management Science*, 63: 497-518.

- Tepper, B. J., Carr, J. C., Breaux, D. M., Geider, S., Hu, C., & Hua, W. 2009. Abusive supervision, intentions to quit, and employees' workplace deviance: A power/dependence analysis. *Organizational Behavior and Human Decision Processes*, 109: 156-167.
- Tepper, B. J., Mitchell, M. S., Haggard, D. L., Kwan, H. K., & Park, H. M. 2015. On the exchange of hostility with supervisors: An examination of self-enhancing and self-defeating perspectives. *Personnel Psychology*, 68: 723-758.
- Thau, S., & Mitchell, M. S. 2010. Self-gain or self-regulation impairment? Tests of competing explanations of the supervisor abuse and employee deviance relationship through perceptions of distributive justice. *Journal of Applied Psychology*, 95: 1009-1031.
- Thau, S., Bennett, R. J., Mitchell, M. S., & Marrs, M. B. 2009. How management style moderates the relationship between abusive supervision and workplace deviance: An uncertainty management theory perspective. *Organizational Behavior and Human Decision Processes*, 108: 79-92.
- Thau, S., Derfler-Rozin, R., Pitesa, M., Mitchell, M. S., & Pillutla, M. M. 2015. Unethical for the sake of the group: Risk of social exclusion and pro-group unethical behavior. *Journal of Applied Psychology*, 100: 98-113.
- Tinsley, C. H., Howell, T. M., & Amanatullah, E. T. 2015. Who should bring home the bacon? How deterministic views of gender constrain spousal wage preferences. *Organizational Behavior and Human Decision Processes*, 126: 37-48.
- Triana, M. D. C., Richard, O. C., & Yücel, İ. 2017. Status incongruence and supervisor gender as moderators of the transformational leadership to subordinate affective organizational commitment relationship. *Personnel Psychology*, 70: 429-467.

- Torelli, C. J., Leslie, L. M., Stoner, J. L., & Puente, R. 2014. Cultural determinants of status: Implications for workplace evaluations and behaviors. *Organizational Behavior and Human Decision Processes*, 123: 34-48.
- Tost, L. P., Wade-Benzoni, K. A., & Johnson, H. H. 2015. Noblesse oblige emerges with time: Power enhances intergenerational beneficence. *Organizational Behavior and Human Decision Processes*, 128: 61-73.
- Toubia, O., Johnson, E., Evgeniou, T., & Delquié, P. 2013. Dynamic experiments for estimating preferences: An adaptive method of eliciting time and risk parameters. *Management Science*, 59: 613-640.
- Triana, M. D. C., García, M. F., & Colella, A. 2010. Managing diversity: How organizational efforts to support diversity moderate the effects of perceived racial discrimination on affective commitment. *Personnel Psychology*, 63: 817-843.
- Tsai, M. H., & Bendersky, C. 2015. The pursuit of information sharing: Expressing task conflicts as debates vs. disagreements increases perceived receptivity to dissenting opinions in groups. *Organization Science*, 27: 141-156.
- Tskhay, K. O., Zhu, R., & Rule, N. O. 2017. Perceptions of charisma from thin slices of behavior predict leadership prototypicality judgments. *The Leadership Quarterly*, 28: 555-562.
- Tucker, S., Ogunfowora, B., & Ehr, D. 2016. Safety in the C-suite: How chief executive officers influence organizational safety climate and employee injuries. *Journal of Applied Psychology*, 101: 1228-1239.
- Uhlmann, E. L., Heaphy, E., Ashford, S. J., Zhu, L., & Sanchez-Burks, J. 2013. Acting professional: An exploration of culturally bounded norms against nonwork role referencing. *Journal of Organizational Behavior*, 34: 866-886.

- Umphress, E. E., Bingham, J. B., & Mitchell, M. S. 2010. Unethical behavior in the name of the company: The moderating effect of organizational identification and positive reciprocity beliefs on unethical pro-organizational behavior. *Journal of Applied Psychology*, 95: 769-780.
- Unsworth, K. L., & McNeill, I. M. 2017. Increasing pro-environmental behaviors by increasing self-concordance: Testing an intervention. *Journal of Applied Psychology*, 102: 88-103.
- Van Dijke, M., De Cremer, D., Brebels, L., & Van Quaquebeke, N. 2015. Willing and able: Action-state orientation and the relation between procedural justice and employee cooperation. *Journal of Management*, 41: 1982-2003.
- Van Dijke, M., Wildschut, T., Leunissen, J. M., & Sedikides, C. 2015. Nostalgia buffers the negative impact of low procedural justice on cooperation. *Organizational Behavior and Human Decision Processes*, 127: 15-29.
- Van Gils, S., Van Quaquebeke, N., van Knippenberg, D., van Dijke, M., & De Cremer, D. 2015. Ethical leadership and follower organizational deviance: The moderating role of follower moral attentiveness. *The Leadership Quarterly*, 26: 190-203.
- Van Houwelingen, G., Van Dijke, M., & De Cremer, D. 2015. Getting it done and getting it right: Leader disciplinary reactions to followers' moral transgressions are determined by construal level mindset. *The Leadership Quarterly*, 26: 878-891.
- Van Houwelingen, G., Van Dijke, M., & De Cremer, D. 2017. Fairness enactment as response to higher level unfairness: The roles of self-construal and spatial distance. *Journal of Management*, 43: 319-347.

- Van Quaquebeke, N., Van Knippenberg, D., & Brodbeck, F. C. 2011. More than meets the eye: The role of subordinates' self-perceptions in leader categorization processes. *The Leadership Quarterly*, 22: 367-382.
- Vincent, L. C., & Kouchaki, M. 2016. Creative, rare, entitled, and dishonest: How commonality of creativity in one's group decreases an individual's entitlement and dishonesty. *Academy of Management Journal*, 59: 1451-1473.
- Vogel, R. M., & Mitchell, M. S. 2017. The motivational effects of diminished self-esteem for employees who experience abusive supervision. *Journal of Management*, 43: 2218-2251.
- Vlachos, P. A., Panagopoulos, N. G., & Rapp, A. A. 2014. Employee judgments of and behaviors toward corporate social responsibility: A multi-study investigation of direct, cascading, and moderating effects. *Journal of Organizational Behavior*, 35: 990-1017.
- Vriend, T., Jordan, J., & Janssen, O. 2016. Reaching the top and avoiding the bottom: How ranking motivates unethical intentions and behavior. *Organizational Behavior and Human Decision Processes*, 137: 142-155.
- Walter, J., Levin, D. Z., & Murnighan, J. K. 2015. Reconnection choices: Selecting the most valuable vs. most preferred dormant ties. *Organization Science*, 26: 1447-1465.
- Walters, D. J., Fernbach, P. M., Fox, C. R., & Slovic, S. A. 2016. Known unknowns: A critical determinant of confidence and calibration. *Management Science*, 63: 4298-4307.
- Wan, F., Ansons, T. L., Chattopadhyay, A., & Leboe, J. P. 2013. Defensive reactions to slim female images in advertising: The moderating role of mode of exposure. *Organizational Behavior and Human Decision Processes*, 120: 37-46.
- Wang, L., & Murnighan, J. K. 2016. How much does honesty cost? Small bonuses can motivate ethical behavior. *Management Science*, 63: 2903-2914.

- Wang, L., & Murnighan, J. K. 2017. The dynamics of punishment and trust. *Journal of Applied Psychology*, 102: 1385-1402.
- Wang, Z., Singh, S. N., Li, Y. J., Mishra, S., Ambrose, M., & Biernat, M. 2017. Effects of employees' positive affective displays on customer loyalty intentions: An emotions-as-social-information perspective. *Academy of Management Journal*, 60: 109-129.
- Wayne, J. H., Butts, M. M., Casper, W. J., & Allen, T. D. 2017. In search of balance: A conceptual and empirical integration of multiple meanings of work-family balance. *Personnel Psychology*, 70: 167-210.
- Waytz, A., Chou, E. Y., Magee, J. C., & Galinsky, A. D. 2015. Not so lonely at the top: The relationship between power and loneliness. *Organizational Behavior and Human Decision Processes*, 130: 69-78.
- Wee, E. X., Liao, H., Liu, D., & Liu, J. 2017. Moving from Abuse to Reconciliation: A Power-Dependence Perspective on When and How a Follower Can Break the Spiral of Abuse. *Academy of Management Journal*, 60: 2352-2380.
- Weiss-Cohen, L., Konstantinidis, E., Speekenbrink, M., & Harvey, N. 2016. Incorporating conflicting descriptions into decisions from experience. *Organizational Behavior and Human Decision Processes*, 135: 55-69.
- Wellman, N., Mayer, D. M., Ong, M., & DeRue, D. S. 2016. When are do-gooders treated badly? Legitimate power, role expectations, and reactions to moral objection in organizations. *The Journal of Applied Psychology*, 101: 793-814.
- Welsh, D. T., & Ordóñez, L. D. 2014. Conscience without cognition: The effects of subconscious priming on ethical behavior. *Academy of Management Journal*, 57: 723-742.

- Welsh, D. T., Ordóñez, L. D., Snyder, D. G., & Christian, M. S. 2015. The slippery slope: How small ethical transgressions pave the way for larger future transgressions. *Journal of Applied Psychology*, 100: 114-127.
- Whitson, J. A., Wang, C. S., See, Y. H. M., Baker, W. E., & Murnighan, J. K. 2015. How, when, and why recipients and observers reward good deeds and punish bad deeds. *Organizational Behavior and Human Decision Processes*, 128: 84-95.
- Whitson, J., Wang, C. S., Kim, J., Cao, J., & Scrimshire, A. 2015. Responses to normative and norm-violating behavior: Culture, job mobility, and social inclusion and exclusion. *Organizational Behavior and Human Decision Processes*, 129: 24-35.
- Wiltermuth, S. S. 2011. Cheating more when the spoils are split. *Organizational Behavior and Human Decision Processes*, 115: 157-168.
- Wiltermuth, S. S., & Flynn, F. J. 2013. Power, moral clarity, and punishment in the workplace. *Academy of Management Journal*, 56: 1002-1023.
- Wiltermuth, S. S., & Tiedens, L. Z. 2011. Incidental anger and the desire to evaluate. *Organizational Behavior and Human Decision Processes*, 116: 55-65.
- Wiltermuth, S. S., Bennett, V. M., & Pierce, L. 2013. Doing as they would do: How the perceived ethical preferences of third-party beneficiaries impact ethical decision-making. *Organizational Behavior and Human Decision Processes*, 122: 280-290.
- Wiltermuth, S. S., Vincent, L. C., & Gino, F. 2017. Creativity in unethical behavior attenuates condemnation and breeds social contagion when transgressions seem to create little harm. *Organizational Behavior and Human Decision Processes*, 139: 106-126.

- Winterich, K. P., Aquino, K., Mittal, V., & Swartz, R. 2013. When moral identity symbolization motivates prosocial behavior: The role of recognition and moral identity internalization. *Journal of Applied Psychology*, 98: 759-770.
- Windeler, J. B., Chudoba, K. M., & Sundrup, R. Z. 2017. Getting away from them all: Managing exhaustion from social interaction with telework. *Journal of Organizational Behavior*, 38: 977-995.
- Winterich, K. P., Mittal, V., & Morales, A. C. 2014. Protect thyself: How affective self-protection increases self-interested, unethical behavior. *Organizational Behavior and Human Decision Processes*, 125: 151-161.
- Wolf, E. B., Lee, J. J., Sah, S., & Brooks, A. W. 2016. Managing perceptions of distress at work: Reframing emotion as passion. *Organizational Behavior and Human Decision Processes*, 137: 1-12.
- Wright, T. A., Quick, J. C., Hannah, S. T., & Blake Hargrove, M. 2017. Best practice recommendations for scale construction in organizational research: The development and initial validation of the Character Strength Inventory CSI. *Journal of Organizational Behavior*, 38: 615-628.
- Wu, C. H., & Parker, S. K. 2017. The role of leader support in facilitating proactive work behavior: A perspective from attachment theory. *Journal of Management*, 43: 1025-1049.
- Yam, K. C., Chen, X. P., & Reynolds, S. J. 2014. Ego depletion and its paradoxical effects on ethical decision making. *Organizational Behavior and Human Decision Processes*, 124: 204-214.

- Yam, K. C., Klotz, A. C., He, W., & Reynolds, S. J. 2017. From good soldiers to psychologically entitled: Examining when and why citizenship behavior leads to deviance. *Academy of Management Journal*, 60: 373-396.
- Yam, K. C., Fehr, R., & Barnes, C. M. 2014. Morning employees are perceived as better employees: Employees' start times influence supervisor performance ratings. *Journal of Applied Psychology*, 99: 1288-1299.
- Yam, K. C., Fehr, R., Keng-Highberger, F. T., Klotz, A. C., & Reynolds, S. J. 2016. Out of control: A self-control perspective on the link between surface acting and abusive supervision. *Journal of Applied Psychology*, 101: 292-301.
- Yip, J. A., & Schweitzer, M. E. 2016. Mad and misleading: Incidental anger promotes deception. *Organizational Behavior and Human Decision Processes*, 137: 207-217.
- Zhang, T., Gino, F., & Norton, M. I. 2016. The surprising effectiveness of hostile mediators. *Management Science*, 63: 1972-1992.
- Zhou, L., Wang, M., Chang, C. H., Liu, S., Zhan, Y., & Shi, J. 2017. Commuting stress process and self-regulation at work: Moderating roles of daily task significance, family interference with work, and commuting means efficacy. *Personnel Psychology*, 70: 891-922.
- Zhu, L., Aquino, K., & Vadera, A. K. 2016. What makes professors appear credible: The effect of demographic characteristics and ideological beliefs. *Journal of Applied Psychology*, 101: 862-880.
- Zlatev, J. J., & Miller, D. T. 2016. Selfishly benevolent or benevolently selfish: When self-interest undermines versus promotes prosocial behavior. *Organizational Behavior and Human Decision Processes*, 137: 112-122.
